# Supplementary material for: Pore-controlled formation of 0D metal complexes in anionic 3D metal–organic frameworks
Source: Royal Society of Chemistry journal article supplement (doi:10.1039/c4ce02261k), 2014-12-09
Supplement: c4ce02261k1.pdf [file c4ce02261k1.pdf]

**Electronic Supplementary Information**

**Pore-Controlled Formation of 0D Metal Complexes in  
Anionic 3D Metal-Organic Frameworks**

Muwei Zhang,<sup>a</sup> Mathieu Bosch,<sup>a</sup> Hong-Cai Zhou<sup>\*ab</sup>

<sup>a</sup> *Address: Department of Chemistry, Texas A&M University, College Station, Texas,  
U.S.A 77842*

Email: zhou@mail.chem.tamu.edu Fax: +1 979 845 1595; Tel: +1 979 845 4034

<sup>b</sup> *Address: Department of Materials Science and Engineering, Texas A&M University,  
College Station, Texas, U.S.A 77842*

# **Contents**

**Section 1. Materials and Instrumentation**

**Section 2. Ligand Synthesis**

**Section 3. Syntheses of PCN-514 series and PCN-518**

**Section 4. Single-Crystal X-ray Crystallography of PCN-514·DMA and PCN-518**

**Section 5. Funding Resources of All Contributors**

## Section 1. Materials and Instrumentation

The H<sub>4</sub>TCPS (4,4',4'',4'''-tetrakis(carboxyphenyl)silane) was synthesized by a reported procedure.<sup>1</sup> The *n*-butyl lithium (*n*-BuLi) and silicon tetrachloride (SiCl<sub>4</sub>) were purchased from Sigma-Aldrich. All other commercial chemicals were purchased from VWR and used without further purification unless otherwise mentioned. The dry THF was produced by a THF still. <sup>1</sup>H nuclear magnetic resonance (NMR) data were recorded on a Mercury 300 MHz NMR spectrometer at the Center for Chemical Characterization and Analysis (CCCA), Department of Chemistry, Texas A&M University.

## Section 2. Ligand Synthesis

The ligand H<sub>4</sub>TCPS was synthesized from the following route (Scheme S1), according to a reported procedure.<sup>1</sup>

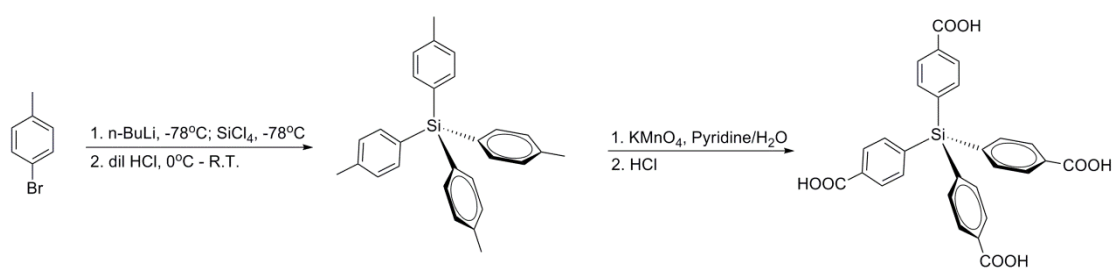

**Scheme S1.** The synthesis of H<sub>4</sub>TCPS ligand

### Section 3. Syntheses of PCN-514 series and PCN-518

#### 1) PCN-514·DMF, $[\text{Cd}_3(\text{TCPS})_2][\text{Cd}(\text{DMF})_6](\text{DMF})_2$

$\text{H}_4\text{TCPS}$  (6.4 mg, 0.0125 mmol) and  $\text{Cd}(\text{NO}_3)_2 \cdot 4\text{H}_2\text{O}$  (23 mg, 0.075 mmol) were ultrasonically dissolved in 1.7 mL DMF (*N, N*-dimethylformamide). The reaction mixture was then heated in an 85 °C oven for 48 h. Large, colorless, blocky crystals were harvested.

#### 2) PCN-514·DMA, $[\text{Cd}_3(\text{TCPS})_2][\text{Cd}(\text{DMA})_4(\text{H}_2\text{O})_2](\text{DMA})_2$

$\text{H}_4\text{TCPS}$  (6.4 mg, 0.0125 mmol) and  $\text{Cd}(\text{NO}_3)_2 \cdot 4\text{H}_2\text{O}$  (23 mg, 0.075 mmol) were ultrasonically dissolved in 1.7 mL DMA (*N, N*-dimethylacetamide). The reaction mixture was then heated in an 85 °C oven for 48 h. Large, colorless, blocky crystals were harvested.

#### 3) PCN-514·DMA·NMP, $[\text{Cd}_3(\text{TCPS})_2][\text{Cd}(\text{DMA})_2(\text{NMP})_2(\text{H}_2\text{O})_2](\text{DMA})_2$

$\text{H}_4\text{TCPS}$  (6.4 mg, 0.0125 mmol) and  $\text{Cd}(\text{NO}_3)_2 \cdot 4\text{H}_2\text{O}$  (23 mg, 0.075 mmol) were ultrasonically dissolved in 1.4 mL DMA (*N, N*-dimethylacetamide) and 0.3 mL NMP (*N*-methyl-2-pyrrolidone). The reaction mixture was then heated in an 85 °C oven for 48 h. Large, colorless, blocky crystals were obtained.

#### 4) PCN-518, $\text{Cd}_3(\text{TCPS})_2$

$\text{H}_4\text{TCPS}$  (6.4 mg, 0.0125 mmol) and  $\text{Cd}(\text{NO}_3)_2 \cdot 4\text{H}_2\text{O}$  (23 mg, 0.075 mmol) were ultrasonically dissolved in 1.7 mL DEF (*N,N*-diethylformamide). The reaction mixture was then heated in an 85 °C oven for 48 h. Large, colorless, blocky crystals were harvested.

Note that the structures of PCN-514·DMF and PCN-514·DMA·NMP were already reported in a previous manuscript, without discussing their host-guest interactions. In the previous manuscript, PCN-514·DMA·NMP (with a formula of  $[\text{Cd}_3(\text{TCPS})_2][\text{Cd}(\text{DMA})_2(\text{NMP})_2(\text{H}_2\text{O})_2](\text{DMA})_2$ ) was named as “PCN-514·DMA”. Nevertheless, this compound is named as “PCN-514·DMA·NMP” in this manuscript for clarity.

## Section 4. Single-Crystal X-ray Crystallography of PCN-514·DMA and PCN-518

The crystals of both PCN-514·DMA and PCN-518 were taken from the mother solution directly, transferred into oil, and mounted onto a loop for single crystal X-ray data collection. Diffractions were measured on a Bruker Smart Apex diffractometer equipped with a Mo-K $\alpha$  sealed-tube X-ray source ( $\lambda = 0.71073$  Å, graphite monochromator) and a cooling device (110 K). The data frames were recorded using APEX2 and processed using *SAINT* within APEX2. The data were corrected for absorption and beam corrections based on the semi-empirical technique as implemented in *SADABS*. The structures were solved by direct methods using *SHELXS* and refined by full-matrix least-squares on  $F^2$  using *SHELXL* in OLEX2.

PCN-514·DMA was integrated and refined in the triclinic crystal system. *XPREP* showed an R(sym) of 0.000 as standard for the Bravais lattice, Triclinic *P*. There was no more probable reasonable symmetry shown. We obtained an R value of 0.0239 and wR<sub>2</sub> of 0.0602 for the solution in *P* $\bar{1}$ .

PCN-518 was integrated and refined in the monoclinic crystal system. Initial refinement provided a solution with an R<sub>1</sub> of 0.0656, however, high electron density in the pores that could not be crystallographically identified even after considerable restraints, most likely due to disordered counterions or solvent, prompted us to use the solvent mask routine of OLEX2. After using the solvent mask routine, we obtained an R<sub>1</sub> of 0.0271 for and a wR<sub>2</sub> of 0.0754 for the solution in *C2/c*.

For both solutions, all non-hydrogen atoms were refined with anisotropic displacement parameters during the final cycles. Organic hydrogen atoms were located in calculated positions with isotropic displacement parameters set to  $1.2 \times U_{eq}$  of the attached atoms. In PCN-518, attempts to crystallographically locate and refine the counterion and solvent peaks were unsuccessful. Contributions to scattering due to these solvent molecules were removed using the solvent mask routine of OLEX2, and structures were then refined again using the data generated. The contents of the solvent region are not represented in the unit cell contents in the crystal data. The CIF files can be obtained free of charge from the Cambridge Crystallographic Data Centre via [www.ccdc.cam.ac.uk/data\\_request/cif](http://www.ccdc.cam.ac.uk/data_request/cif).

CCDC 1032924 for PCN-514·DMA and CCDC 1032925 for PCN-518. Note that the cif files of PCN-514·DMF (CCDC 942375) and PCN-514·DMA·NMP (CCDC 942374) were already submitted to CCDC with a previous manuscript.<sup>1</sup>

APEX2 v2012.2.0 and SAINT v7.68A data collection and data processing programs, respectively. Bruker Analytical X-ray Instruments, Inc., Madison, WI; SADABS v2008/1 semi-empirical absorption and beam correction program. G.M. Sheldrick, University of Göttingen, Germany.

G. M. Sheldrick, *SHELXTL*, Version 6.14, Structure Determination Software Suite, Bruker AXS, Madison, WI, **2003**.

Dolomanov, O.V.; Bourhis, L.J.; Gildea, R.J.; Howard, J.A.K.; Puschmann, H., OLEX2: A complete structure solution, refinement and analysis program (**2009**). *J. Appl. Cryst.*, 42, 339-341.

The graphic representation of crystal structures in this manuscript were made by:

Diamond - Crystal and Molecular Structure Visualization

Crystal Impact - Dr. H. Putz & Dr. K. Brandenburg GbR, Kreuzherrenstr. 102, 53227 Bonn, Germany

<http://www.crystalimpact.com/diamond>



**Table S1.** Crystal data and structure refinements for PCN-514·DMA and PCN-518.

| Compound                                                   | PCN-514·DMA                                                                       | Compound                                                   | PCN-518                                                                            |
|------------------------------------------------------------|-----------------------------------------------------------------------------------|------------------------------------------------------------|------------------------------------------------------------------------------------|
| Formula                                                    | C <sub>40</sub> H <sub>45</sub> Cd <sub>2</sub> N <sub>3</sub> O <sub>12</sub> Si | Formula                                                    | C <sub>224</sub> H <sub>128</sub> Cd <sub>12</sub> O <sub>64</sub> Si <sub>8</sub> |
| <i>CCDC</i> #                                              | 1032924                                                                           | <i>CCDC</i> #                                              | 1032925                                                                            |
| <i>F</i> <sub>w</sub>                                      | 1012.68                                                                           | <i>F</i> <sub>w</sub>                                      | 5416.78                                                                            |
| Shape                                                      | Block                                                                             | Shape                                                      | Block                                                                              |
| Crystal system                                             | Triclinic                                                                         | Crystal system                                             | Monoclinic                                                                         |
| Space group                                                | <i>PT</i>                                                                         | Space group                                                | <i>C2/c</i>                                                                        |
| <i>a</i> (Å)                                               | 14.0970(19)                                                                       | <i>a</i> (Å)                                               | 26.567(5)                                                                          |
| <i>b</i> (Å)                                               | 14.2015(19)                                                                       | <i>b</i> (Å)                                               | 14.332(3)                                                                          |
| <i>c</i> (Å)                                               | 14.2649(19)                                                                       | <i>c</i> (Å)                                               | 25.354(7)                                                                          |
| $\alpha$ (°)                                               | 115.663(1)                                                                        | $\alpha$ (°)                                               | 90.00                                                                              |
| $\beta$ (°)                                                | 113.627(1)                                                                        | $\beta$ (°)                                                | 119.200(2)                                                                         |
| $\gamma$ (°)                                               | 97.603(2)                                                                         | $\gamma$ (°)                                               | 90.00                                                                              |
| <i>V</i> (Å <sup>3</sup> )                                 | 2190.6(5)                                                                         | <i>V</i> (Å <sup>3</sup> )                                 | 8427(3)                                                                            |
| <i>Z</i>                                                   | 1                                                                                 | <i>Z</i>                                                   | 1                                                                                  |
| <i>d</i> <sub>calcd.</sub> (g/cm <sup>3</sup> )            | 1.535                                                                             | <i>d</i> <sub>calcd.</sub> (g/cm <sup>3</sup> )            | 1.067                                                                              |
| $\mu$ (mm <sup>-1</sup> )                                  | 1.060                                                                             | $\mu$ (mm <sup>-1</sup> )                                  | 0.823                                                                              |
| <i>F</i> (000)                                             | 1024.0                                                                            | <i>F</i> (000)                                             | 2672.0                                                                             |
| $\theta_{\max}$ [deg]                                      | 54.000                                                                            | $\theta_{\max}$ [deg]                                      | 54.000                                                                             |
| Completeness                                               | 0.993                                                                             | Completeness                                               | 0.998                                                                              |
| Collected reflections                                      | 24914                                                                             | Collected reflections                                      | 11193                                                                              |
| Unique reflections                                         | 9495                                                                              | Unique reflections                                         | 9196                                                                               |
| Parameters                                                 | 543                                                                               | Parameters                                                 | 349                                                                                |
| Restraints                                                 | 0                                                                                 | Restraints                                                 | 0                                                                                  |
| <i>R</i> <sub>int</sub>                                    | 0.0282                                                                            | <i>R</i> <sub>int</sub>                                    | 0.0377                                                                             |
| <i>R</i> 1 [ <i>I</i> > 2σ( <i>I</i> )]                    | 0.0239                                                                            | <i>R</i> 1 [ <i>I</i> > 2σ( <i>I</i> )]                    | 0.0271                                                                             |
| <i>wR</i> 2 [ <i>I</i> > 2σ( <i>I</i> )]                   | 0.0602                                                                            | <i>wR</i> 2 [ <i>I</i> > 2σ( <i>I</i> )]                   | 0.0754                                                                             |
| <i>R</i> 1 (all data)                                      | 0.0269                                                                            | <i>R</i> 1 (all data)                                      | 0.0304                                                                             |
| <i>wR</i> 2 (all data)                                     | 0.0620                                                                            | <i>wR</i> 2 (all data)                                     | 0.0767                                                                             |
| GOF on <i>F</i> <sup>2</sup>                               | 1.0450                                                                            | GOF on <i>F</i> <sup>2</sup>                               | 1.0590                                                                             |
| $\Delta\rho_{\max}/\Delta\rho_{\min}$ [e·Å <sup>-3</sup> ] | 1.153/ -0.788                                                                     | $\Delta\rho_{\max}/\Delta\rho_{\min}$ [e·Å <sup>-3</sup> ] | 0.542/ -0.381                                                                      |

## Section 5. Funding Resources of All Contributors

The authors sincerely acknowledge the following funding resources:

M. Z. was supported by the ARPA-e project DE-AR0000249.

M. B. was supported by the Department of Chemistry at Texas A&M University, the ARPA-e project DE-AR0000249, and the Texas Space Grant.

### References:

1. Zhang, M.; Chen, Y.-P.; Zhou, H.-C., *CrystEngComm* **2013**, *15*, 9544-9552.
